# Supplementary material for: Morphology control of one-dimensional heterojunctions for highly efficient photoanodes used for solar water splitting
Source: Royal Society of Chemistry journal article supplement (doi:10.1039/c4ta00702f), 2014-01-01
Supplement: c4ta00702f1.pdf [file c4ta00702f1.pdf]

Supporting Information

**Morphology Control of One-Dimensional  
Heterojunctions for Highly Efficient  
Photoanodes Used for Solar Water Splitting**

Sang Youn Chae,<sup>a,b</sup> Hyejin Jung,<sup>a</sup> Hyo Sang Jeon,<sup>a,c</sup> Byoung Koun Min,<sup>a</sup> Yun Jeong

Hwang,<sup>a,c,\*</sup> and Oh-Shim Joo<sup>a,c,\*</sup>

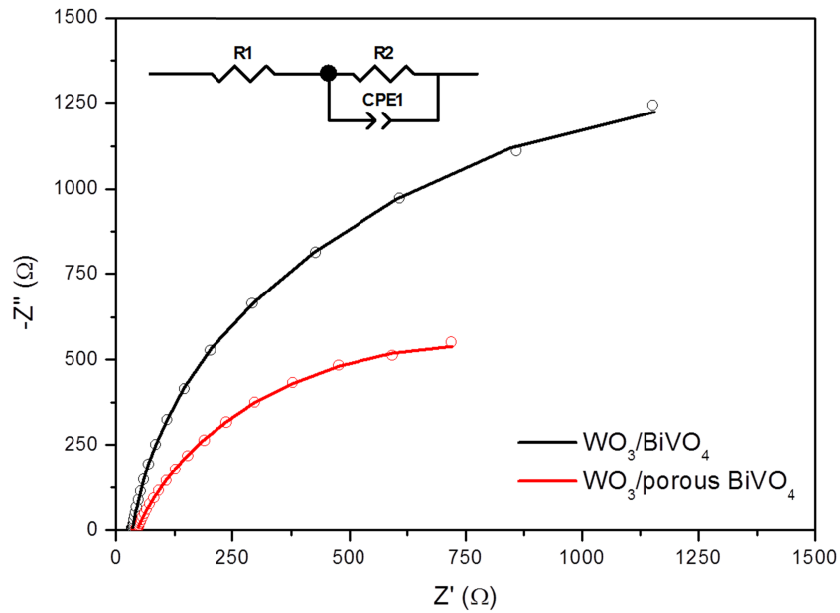

| Sample                                    | R1    | R2   | CPE1                      | n       |
|-------------------------------------------|-------|------|---------------------------|---------|
| WO <sub>3</sub> /BiVO <sub>4</sub>        | 35.29 | 2776 | 7.3443 × 10 <sup>-6</sup> | 0.93033 |
| WO <sub>3</sub> /porous BiVO <sub>4</sub> | 45.27 | 1464 | 2.6233 × 10 <sup>-5</sup> | 0.81103 |

**Figure S1** Nyquist plots and the analyzed impedance parameters of the WO<sub>3</sub>/BiVO<sub>4</sub> (BiVO<sub>4</sub> was spin-coated without binder), and WO<sub>3</sub>/porous BiVO<sub>4</sub> photoanodes (BiVO<sub>4</sub> was spin-coated with EC binder). R<sub>1</sub> is a solution resistance, R<sub>2</sub> is a charge transfer resistance between electrode/electrolyte, and CPE1 is a constant phase element between electrode/electrolyte according to the equation,  $Z_{CPE} = \frac{1}{C} j\omega^{-n}$ . The impedance measurements indicated that the charge transfer resistance (R<sub>2</sub>) and CPE decreased with the porous nature of BiVO<sub>4</sub> layer.

**Table S1.** Photocurrent density and IPCE value obtained in this work compared with the results of recent reports related to BiVO<sub>4</sub> photoanodes, including the highly efficient hematite Fe<sub>2</sub>O<sub>3</sub> photoanode. Evidently, this work reports the highest photocurrent density of a BiVO<sub>4</sub> photoanode at 1.23 V vs RHE, prepared on an FTO substrate.

| ref.      | Current density (mA/cm <sup>2</sup> )        | IPCE                                  | combination                     | doping                         | cocatalyst       | Solution                                              | year |
|-----------|----------------------------------------------|---------------------------------------|---------------------------------|--------------------------------|------------------|-------------------------------------------------------|------|
| this work | 3.3 at 1.23V vs. RHE                         | 60% at 1.23V vs. RHE                  | WO <sub>3</sub>                 | -                              | Co-Pi            | 0.5M Na <sub>2</sub> SO <sub>4</sub> K buffer (pH 7)  | 2014 |
| 1         | 1.7 at 1.2V vs. RHE                          | -                                     | -                               | -                              | FeOOH            | 0.1M K buffer                                         | 2012 |
| 2         | 1 at 0.6V vs. Ag/AgCl                        | 62% at 0.9V vs. Ag/AgCl               | -                               | Mo-doped                       | Co-Pi            | 0.5M Na <sub>2</sub> SO <sub>4</sub> K buffer (pH 7)  | 2011 |
| 3         | 1.7 at 1.2V vs. RHE                          | 40-60% at 1.2V vs. RHE                | -                               | -                              | FeOOH            | 0.1M KH <sub>2</sub> PO <sub>4</sub> (pH 7)           | 2012 |
| 4         | 3.0 at 1.23 V vs. RHE                        | -                                     | -                               | W-doped                        | Co-Pi            | 0.1M K buffer (pH 7.3)                                | 2013 |
| 4         | 3.6 at 1.23 V vs. RHE                        | -                                     | on a textured Asahi VU-type TCO | W-doped                        | Co-Pi            | 0.1M K buffer (pH 7.3)                                | 2013 |
| 5         | 1.7 at 0.6V vs. Ag/AgCl                      | 40% at 0.62V vs. Ag/AgCl              | CuWO <sub>4</sub>               | -                              | -                | 0.1M NaHCO <sub>3</sub> (pH 7)                        | 2013 |
| 6         | 1 at 0.6V vs. Ag/AgCl                        | -                                     | -                               | -                              | -                | 1.0M Na <sub>2</sub> SO <sub>4</sub> (pH 7)           | 2010 |
| 7         | 1.7 at 1.23V vs. RHE                         | 40% (front) 80%(back) at 1.23 vs. RHE | SnO <sub>2</sub>                | -                              | Co-Pi            | 0.5M K <sub>2</sub> SO <sub>4</sub> K buffer (pH 5.6) | 2012 |
| 8         | 1.3 at 0.6V Ag/AgCl                          | 37% at 0.7V vs. Ag/AgCl               | WO <sub>3</sub>                 | -                              | -                | 0.5M Na <sub>2</sub> SO <sub>4</sub>                  | 2011 |
| 9         | 3 at 1.2V vs. RHE                            | 40% at 0.6V vs. RHE (in sulfite)      | -                               | Mo-doped                       | FeOOH            | 0.1M K buffer (pH 7)                                  | 2014 |
| 10        | 1.7 at 0.6V vs. Ag/AgCl                      | 37%                                   | WO <sub>3</sub>                 | Mo-doped                       | -                | 0.5M Na <sub>2</sub> SO <sub>4</sub>                  | 2012 |
| 11        | 1.4 at 1.23 vs. RHE (integrated)             | 50% at 1.63V vs. RHE                  | SnO <sub>2</sub>                | W-doped                        | -                | 0.15M K <sub>2</sub> SO <sub>4</sub> (pH 7)           | 2011 |
| 12        | 2.5 at 0.6V vs. Ag/AgCl                      | 45% at 0.5V vs. Ag/AgCl               | WO <sub>3</sub>                 | -                              | Co-Pi            | 0.5M Na <sub>2</sub> SO <sub>4</sub>                  | 2013 |
| 13        | 0.07 at 1V vs. Ag/AgCl                       | 4%                                    | RGO                             | -                              | -                | 0.1M Na <sub>2</sub> SO <sub>4</sub>                  | 2010 |
| 14        | 2.2 at 0.6V vs. SCE                          | -                                     | -                               | Mo-doped                       | -                | 0.5M Na <sub>2</sub> SO <sub>4</sub> (pH 6.5)         | 2013 |
| 15        | 1.5 at 1.2V vs. RHE                          | 35% at 1.2V vs. RHE                   | -                               | W-doped                        | Co-Pi            |                                                       | 2011 |
| 16        | 2.4 at 1.23V vs. RHE                         | -                                     | WO <sub>3</sub>                 | Mo-doped                       | Co-Pi            | 0.1M K buffer (pH 7)                                  | 2013 |
| 17        | 2.6 at 1.2V vs. RHE                          | 50% at 1V vs. RHE                     | -                               | Mo-doped                       | RhO <sub>2</sub> | 0.5M K <sub>2</sub> SO <sub>4</sub> K buffer (pH 6.5) | 2011 |
| 18        | 2.1 at 1.23V vs. RHE / 4.0 at 1.53 V vs. RHE | -                                     | -                               | Fe <sub>2</sub> O <sub>3</sub> | -                | 1M NaOH (pH=13.6)                                     | 2013 |

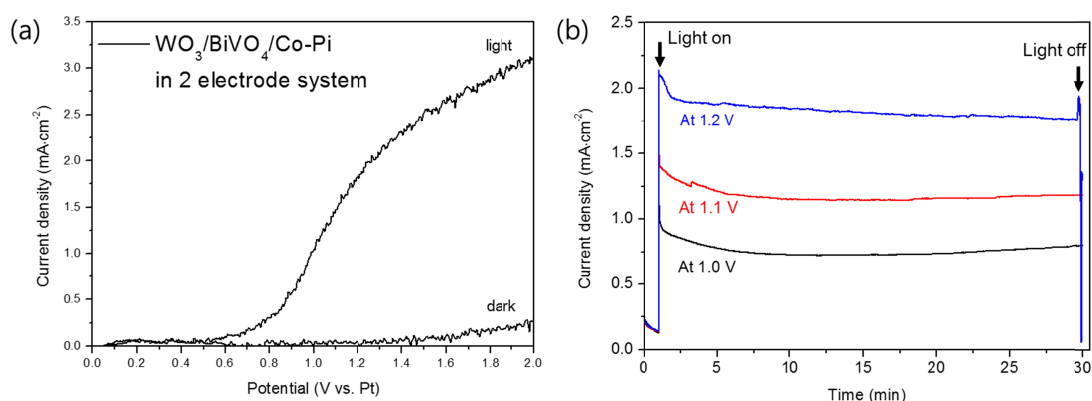

**Figure S2** (a) Representative photocurrents regarding to bias potentials with 1-D  $\text{WO}_3/\text{BiVO}_4/\text{Co-Pi}$  photoanode in a two electrode configuration using a Pt as a counter electrode, and (b) representative chronoamperometry measurements of the photocurrents at given bias potentials (1.0, 1.1, and 1.2 V) versus a Pt counter electrode while the GC analysis were performed. The photocurrents were monitored in the airtight closed PEC cell which was directly connected to the GC inlet, and Ar carrier gas was circulating while the gaseous products were accumulating for 30 min.

| Potential (V vs Pt CE) | Faradaic efficiency (%) |         |         | Average (%) |
|------------------------|-------------------------|---------|---------|-------------|
|                        | 1 trial                 | 2 trial | 3 trial |             |
| 1.0                    | 94.5                    | 94.4    | 92.9    | 93.93       |
| 1.1                    | 94.0                    | 93.0    | 93.1    | 93.36       |
| 1.2                    | 93.7                    | 94.1    | 93.5    | 93.76       |

**Table S2** Faradaic efficiencies for hydrogen at given bias potentials. The amount of the produced hydrogen and oxygen were measured after 30 min reaction in each measurement, which also showed 2:1 ratio of hydrogen to oxygen confirming water splitting.

## References

1. M. Ni, M. K. H. Leung, D. Y. C. Leung and K. Sumathy, *Renewable and Sustainable Energy Reviews*, 2007, **11**, 401.
2. S. K. Pilli, T. E. Furtak, L. D. Brown, T. G. Deutsch, J. A. Turner and A. M. Herring, *Energy Environ. Sci.*, 2011, **4**, 5028.
3. J. A. Seabold and K.-S. Choi, *J. Am. Chem. Soc.*, 2012, **134**, 2186.
4. F. F. Abdi, L. Han, A. H. M. Smets, M. Zeman, B. Dam and R. van de Krol, *Nat. Commun.*, 2013, **4**, 1.
5. S. K. Pilli, T. G. Deutsch, T. E. Furtak, L. D. Brown, J. A. Turner and A. M. Herring, *Phys. Chem. Chem. Phys.*, 2013, **15**, 3273.
6. L. Wenjun, W. Zhiqiang, W. Lijuan, L. Zhaosheng, Y. Tao and Z. Zhigang, *J. Phys. D: Appl. Phys.*, 2010, **43**, 405402.
7. F. F. Abdi and R. van de Krol, *J. Phys. Chem. C*, 2012, **116**, 9398.
8. S. J. Hong, S. Lee, J. S. Jang and J. S. Lee, *Energy Environ. Sci.*, 2011, **4**, 1781.
9. Y. Park, D. Kang and K.-S. Choi, *Phys. Chem. Chem. Phys.*, 2014, **16**, 1238.
10. K. Zhang, X.-J. Shi, J. K. Kim and J. H. Park, *Phys. Chem. Chem. Phys.*, 2012, **14**, 11119.
11. Y. Liang, T. Tsubota, L. P. A. Mooij and R. van de Krol, *J. Phys. Chem. C*, 2011, **115**, 17594.
12. S. K. Pilli, R. Janarthanan, T. G. Deutsch, T. E. Furtak, L. D. Brown, J. A. Turner and A. M. Herring, *Phys. Chem. Chem. Phys.*, 2013, **15**, 14723.
13. Y. H. Ng, A. Iwase, A. Kudo and R. Amal, *J. Phys. Chem. Lett.*, 2010, **1**, 2607.
14. W. Luo, J. Wang, X. Zhao, Z. Zhao, Z. Li and Z. Zou, *Phys. Chem. Chem. Phys.*, 2013, **15**, 1006.
15. D. K. Zhong, S. Choi and D. R. Gamelin, *J. Am. Chem. Soc.*, 2011, **133**, 18370.
16. H. W. Jeong, T. H. Jeon, J. S. Jang, W. Choi and H. Park, *J. Phys. Chem. C*, 2013, **117**, 9104.
17. W. Luo, Z. Yang, Z. Li, J. Zhang, J. Liu, Z. Zhao, Z. Wang, S. Yan, T. Yu and Z. Zou, *Energy Environ. Sci.*, 2011, **4**, 4046.
18. S. C. Warren, K. Voitchovsky, H. Dotan, C. M. Leroy, M. Cornuz, F. Stellacci, C. Hébert, A. Rothschild and M. Grätzel, *Nat. Mater.*, 2013, **12**, 842.
